# Supplementary material for: Hepatic Brucelloma Diagnosis and Long-Term Treatment, France
Source: PubMed Central journal article supplement (PMC6478221; doi:10.3201/eid2505.180613), 2019-05
Supplement: 18-0613-Techapp-s1.pdf [file 18-0613-Techapp-s1.pdf]

# Hepatic Brucellosis Diagnosis and Long-term Treatment, France

## Appendix

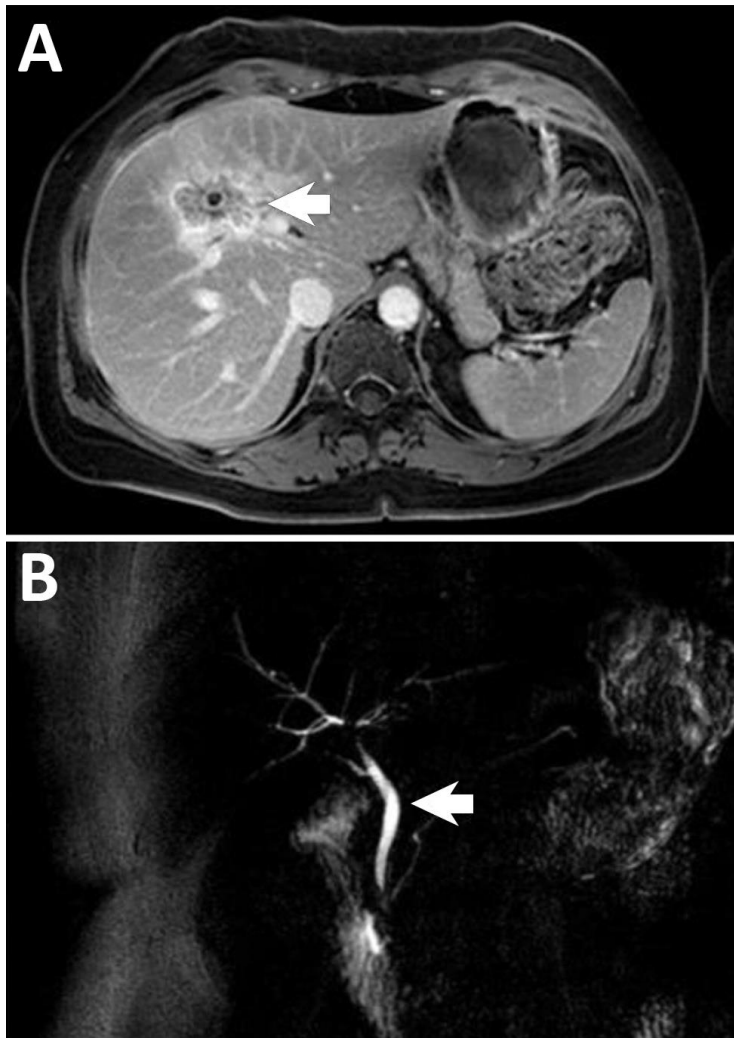

**Appendix Figure.** Computed tomography image showing a liver abscess in a patient with hepatic brucellosis at the time of diagnosis. Arrow indicates a hypodense lesion with a peripheral enhancement of the density and a central calcification. B) Computed tomography image of the liver of a patient with hepatic brucellosis after a 2-month treatment with doxycycline plus rifampin. Arrow indicates thrombosis of the median hepatic vein and infiltration of the gallbladder.
